# Supplementary material for: Shared Genetics between Age at Menarche and Type 2 Diabetes Mellitus: Genome-Wide Genetic Correlation Study
Source: MDPI journal article supplement (doi:10.3390/biomedicines12010157), 2024-01-11
Supplement: s1 [file s1]

# **Supplementary Information**

| <b>PLINK functions</b> | <b>Meaning</b>                                                                         |
|------------------------|----------------------------------------------------------------------------------------|
| --filter-males         | filters out males                                                                      |
| --geno 0.02            | filters out SNPs with genotype missing rate higher than 2%                             |
| --mind 0.02            | filters out samples with genotype missing rate higher than 2%                          |
| --maf 0.01             | filters out SNPs with minor allele frequency (MAF)* below 0.01                         |
| --hwe 0.0000001        | filters out SNPs which have Hardy-Weinberg equilibrium* exact test p-value below 1E-06 |
| --prune                | filters out samples with missing phenotypes                                            |

**Table S1.** Description of quality control procedures

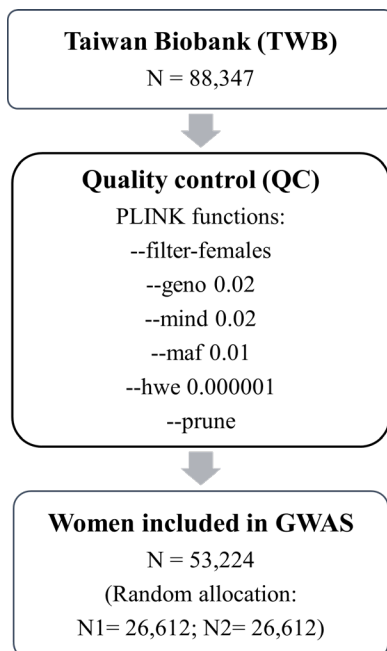

**Figure S1.** Description of quality control procedures

\*Minor allele frequency (MAF): The frequency at which a less common allele occurs in a population. SNPs with very low MAF are prone to genotyping errors.

\*Hardy-Weinberg equilibrium (HWE): The frequency of genotypes in a population may be calculated using the formula  $p^2 + q^2 + 2pq = 1$ . SNPs deviating from HWE are prone to genotyping errors.

**Table S2.** General characteristics of participants in 2 datasets

| Characteristics         |                     | GWAS of AAM (N = 26612) |         | GWAS of T2DM (N = 26612) |         |
|-------------------------|---------------------|-------------------------|---------|--------------------------|---------|
|                         |                     | N or mean               | % or SD | N or mean                | % or SD |
| <b>Education level</b>  |                     |                         |         |                          |         |
| Low                     |                     | 1509                    | 5.67    | 1572                     | 5.9     |
| Medium                  |                     | 10537                   | 39.59   | 10686                    | 40.2    |
| High                    |                     | 14566                   | 54.73   | 14354                    | 53.9    |
| <b>Age</b>              |                     |                         |         |                          |         |
| Year                    |                     | 50.82                   | 10.77   | 51.00                    | 10.72   |
| Older ( $\geq 65$ )     |                     | 2750                    | 10.33   | 2771                     | 10.41   |
| <b>AAM</b>              |                     |                         |         |                          |         |
| Year                    |                     | 13.26                   | 1.47    | 13.26                    | 1.47    |
| Early ( $\leq 11$ )     |                     | 2918                    | 10.96   | 2917                     | 10.96   |
| <b>Diabetic factors</b> |                     |                         |         |                          |         |
| T2DM                    | Yes                 | 1158                    | 4.351   | 1164                     | 4.374   |
| BMI                     | kg·m <sup>-2</sup>  | 23.63                   | 3.80    | 23.62                    | 3.74    |
| BMI $\geq 24.5$         | Yes                 | 9055                    | 34.03   | 9171                     | 34.46   |
| Waistline               | cm                  | 80.79                   | 9.75    | 80.74                    | 9.71    |
| Waistline $\geq 80$     | Yes                 | 13572                   | 51.00   | 13481                    | 50.66   |
| BFR                     | %                   | 32.10                   | 6.40    | 32.08                    | 6.37    |
| BFR $\geq 30$           | Yes                 | 16508                   | 62.03   | 16508                    | 62.03   |
| FBG                     | mg·dl <sup>-1</sup> | 94.22                   | 18.43   | 94.41                    | 18.85   |
| HbA <sub>1c</sub>       | %                   | 5.76                    | 0.73    | 5.77                     | 0.75    |
| SBP                     | mmHg                | 117.73                  | 18.09   | 118.05                   | 18.48   |
| DBP                     | mmHg                | 71.16                   | 10.30   | 71.26                    | 10.44   |
| TG                      | mg·dl <sup>-1</sup> | 105.40                  | 77.35   | 104.97                   | 73.95   |
| Total cholesterol       | mg·dl <sup>-1</sup> | 198.93                  | 36.34   | 198.92                   | 36.14   |
| HDL-C                   | mg·dl <sup>-1</sup> | 58.49                   | 13.37   | 58.44                    | 13.37   |
| LDL-C                   | mg·dl <sup>-1</sup> | 120.83                  | 31.83   | 120.89                   | 32.06   |

Abbreviations: GWAS, genome-wide association study; N, total number; SD, standard deviation; T2DM,

type 2 diabetes mellitus; BMI, body mass index; BFR, body fat rate; FBG, fasting blood glucose; HbA<sub>1c</sub>, glycated hemoglobin A1C; SBP, systolic blood pressure; DBP, diastolic blood pressure; TG, triglyceride; HDL-C, high-density lipoprotein cholesterol; LDL-C, low-density lipoprotein cholesterol.

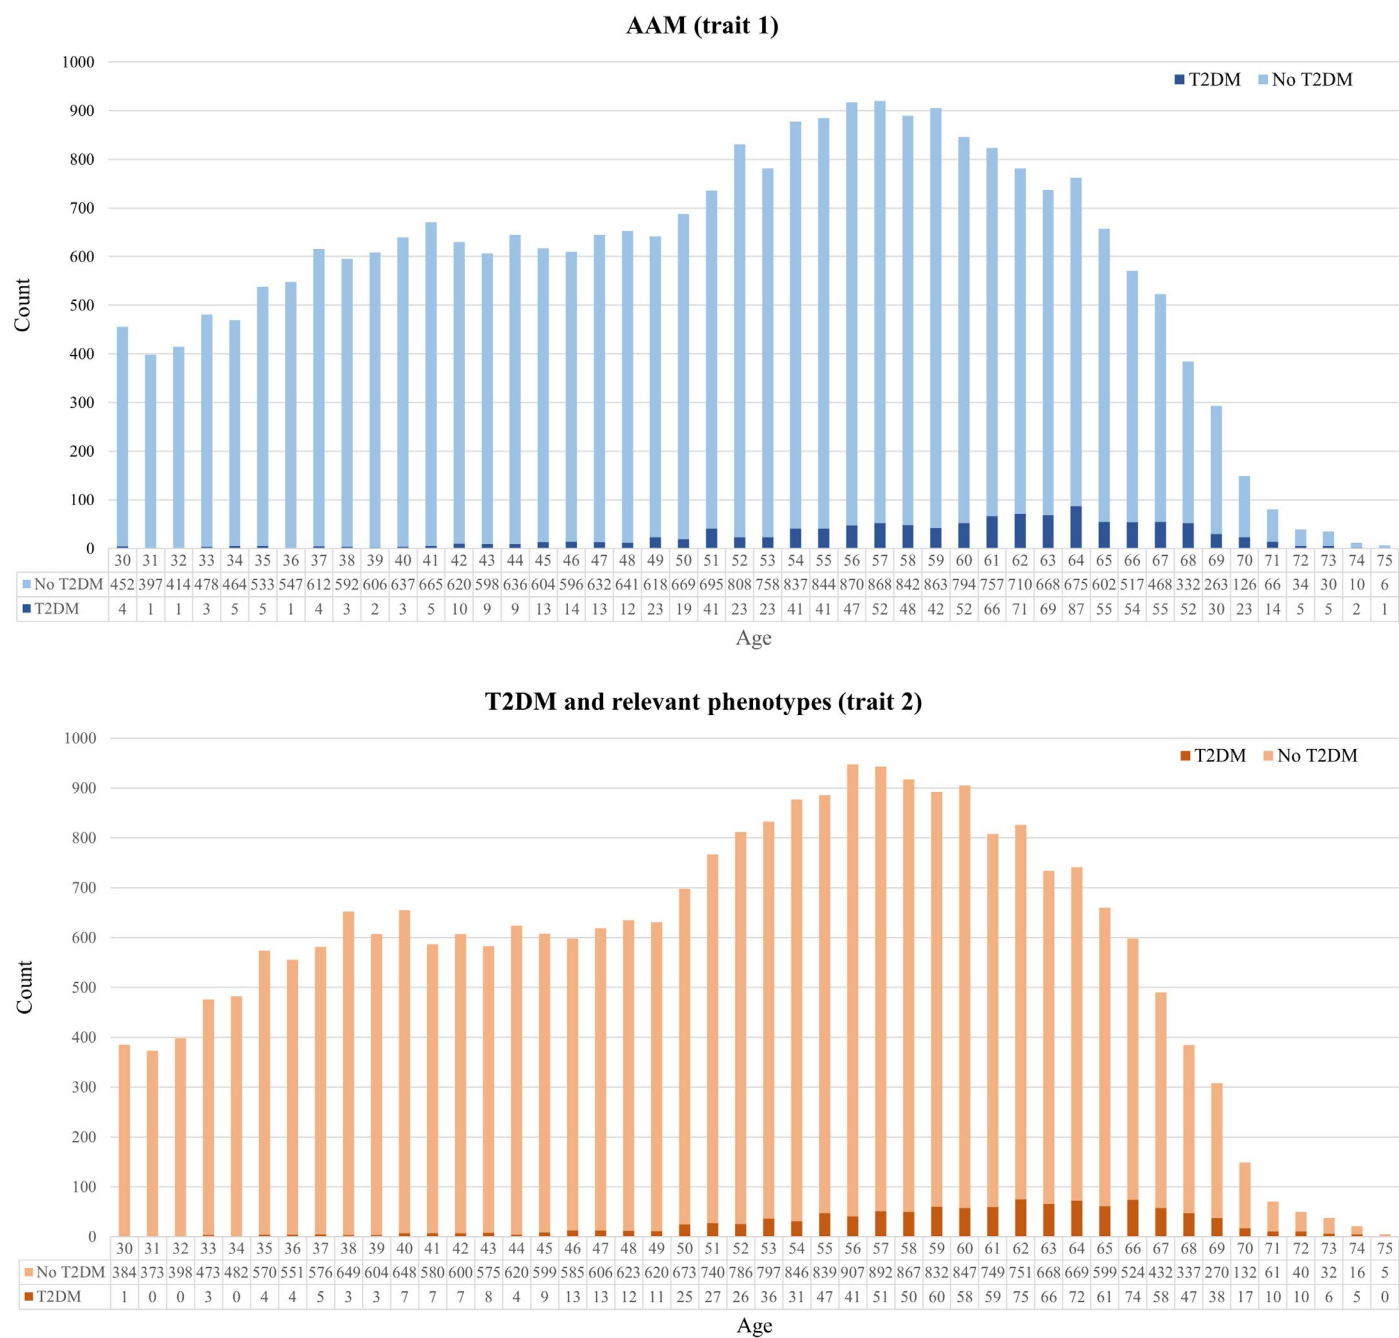

**Figure S2. Risk of T2DM based on age of participants**



**Table S3.** Top 10 enriched Kyoto Encyclopedia of Genes and Genomes (KEGG) pathways

| Pathway                                | False discovery rate |
|----------------------------------------|----------------------|
| Insulin signaling pathway              | 1.02e-12             |
| Glucagon signaling pathway             | 9.81e-09             |
| Gastric acid secretion                 | 2.5e-07              |
| Phototransduction                      | 4.51e-07             |
| Human cytomegalovirus infection        | 4.51e-07             |
| Cellular senescence                    | 2.07e-06             |
| RNA degradation                        | 3.76e-06             |
| AMPK signaling pathway                 | 4.30e-06             |
| Circadian entrainment                  | 1.01e-05             |
| Adrenergic signaling in cardiomyocytes | 1.43e-05             |
